# Supplementary material for: Carbon nanotube@layered nickel silicate coaxial nanocables as excellent anode materials for lithium and sodium storage
Source: Royal Society of Chemistry journal article supplement (doi:10.1039/c5ta03408f), 2015-01-01
Supplement: c5ta03408f1.pdf [file c5ta03408f1.pdf]

## Supporting information

### Carbon Nanotube@Layered Nickel Silicate Coaxial Nanocables as Excellent Anode Materials for Lithium and Sodium Storage

Chen-Xi Gui, Shu-Meng Hao, Yuan Liu, Jin Qu\*, Cheng Yang, Yunhua Yu, Qian-Qian Wang and  
Zhong-Zhen Yu\*

State Key Laboratory of Organic-Inorganic Composites, College of Materials Science and  
Engineering, Beijing University of Chemical Technology, Beijing 100029, China

Corresponding author: E-mail: [qujin@mail.buct.edu.cn](mailto:qujin@mail.buct.edu.cn) (J. Qu), [yuzz@mail.buct.edu.cn](mailto:yuzz@mail.buct.edu.cn) (Z.-Z.  
Yu)

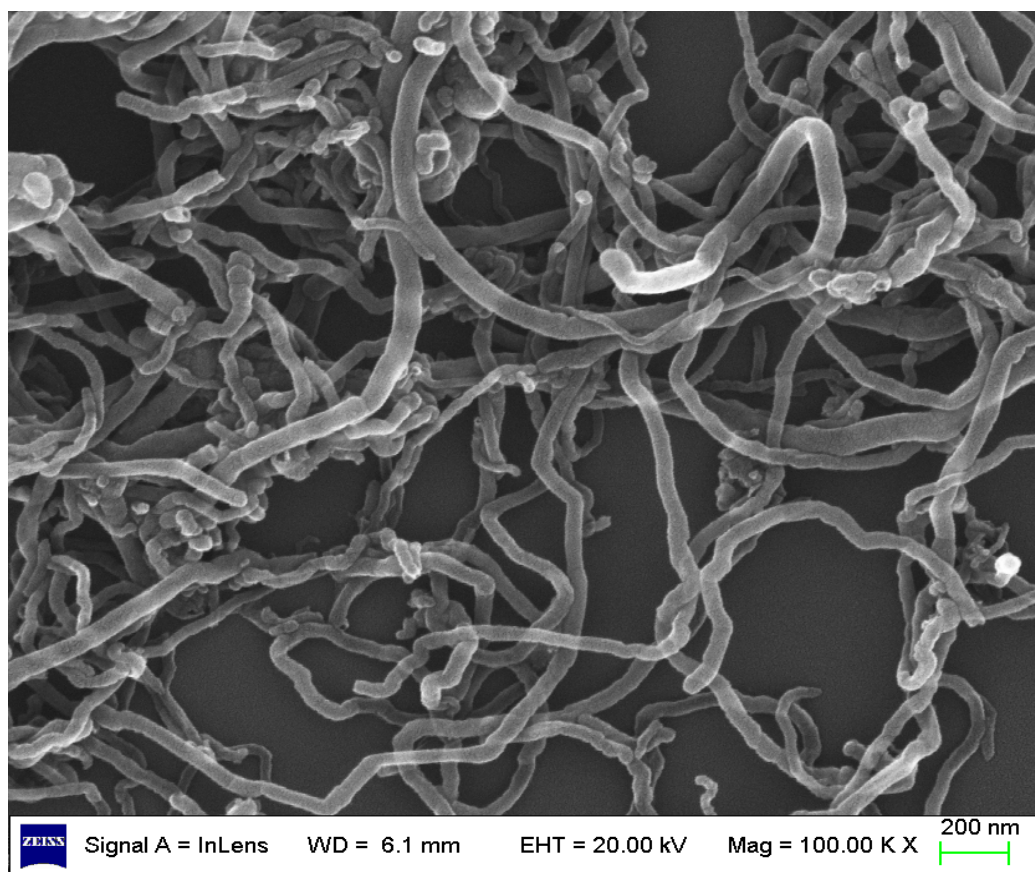

**Figure S1.** SEM image of CNTs.

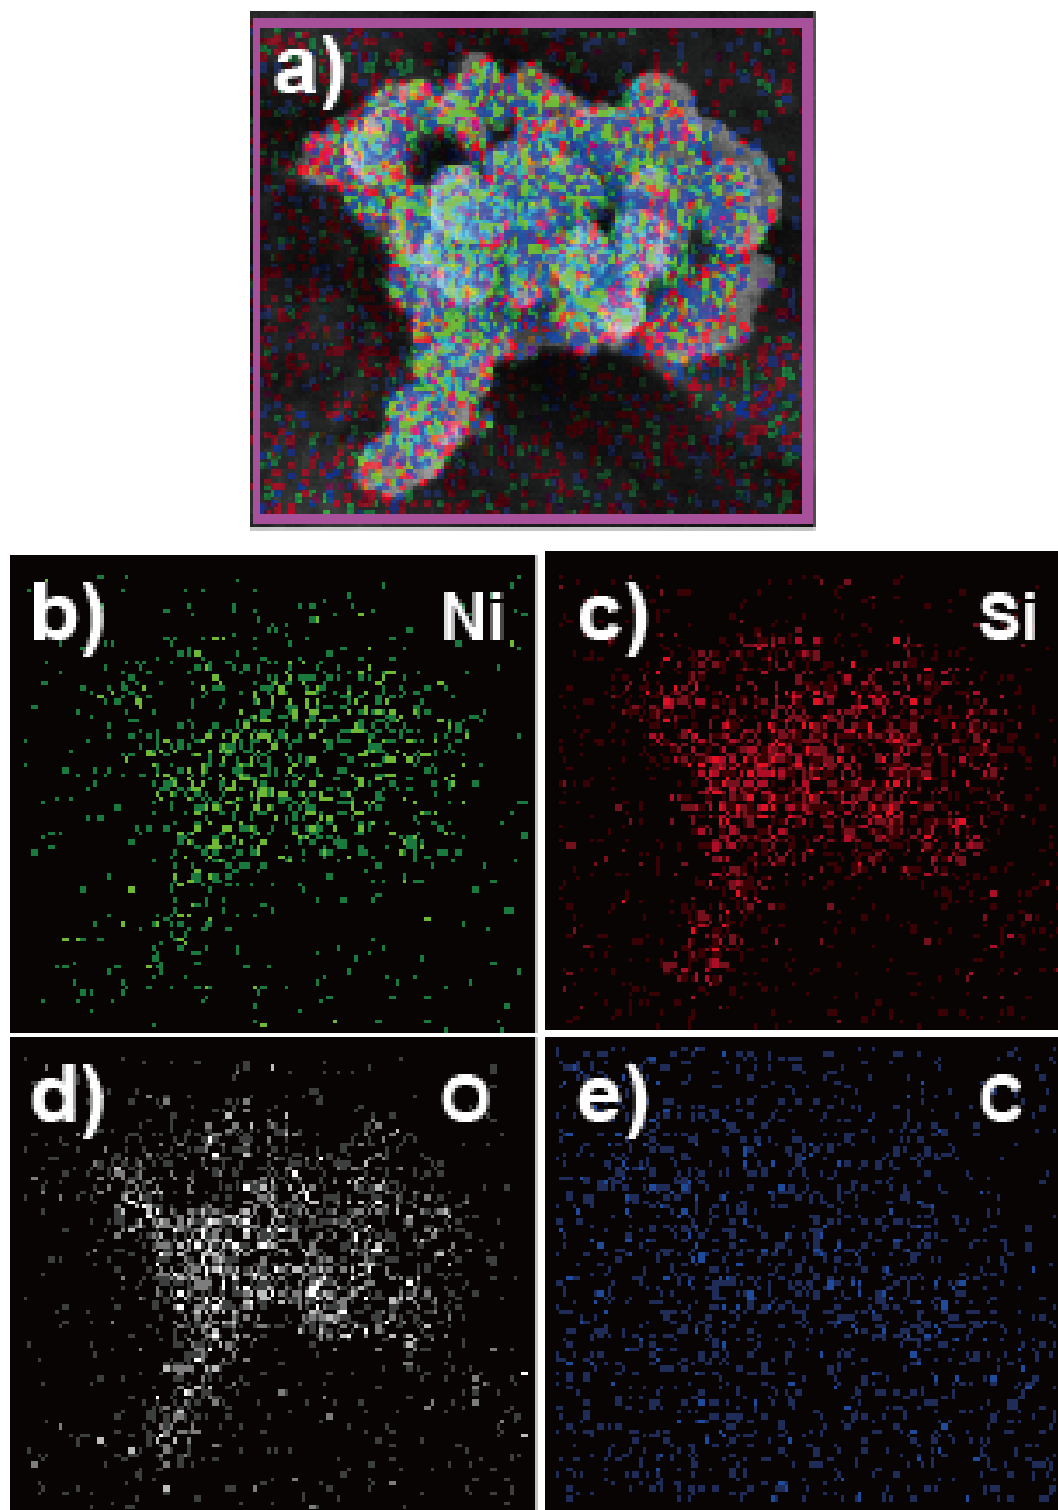

**Figure S2.** EDX elemental mapping of area shown in a) CNT@NiSiOx, for b) nickel, c) silicon, d) oxygen and e) carbon.

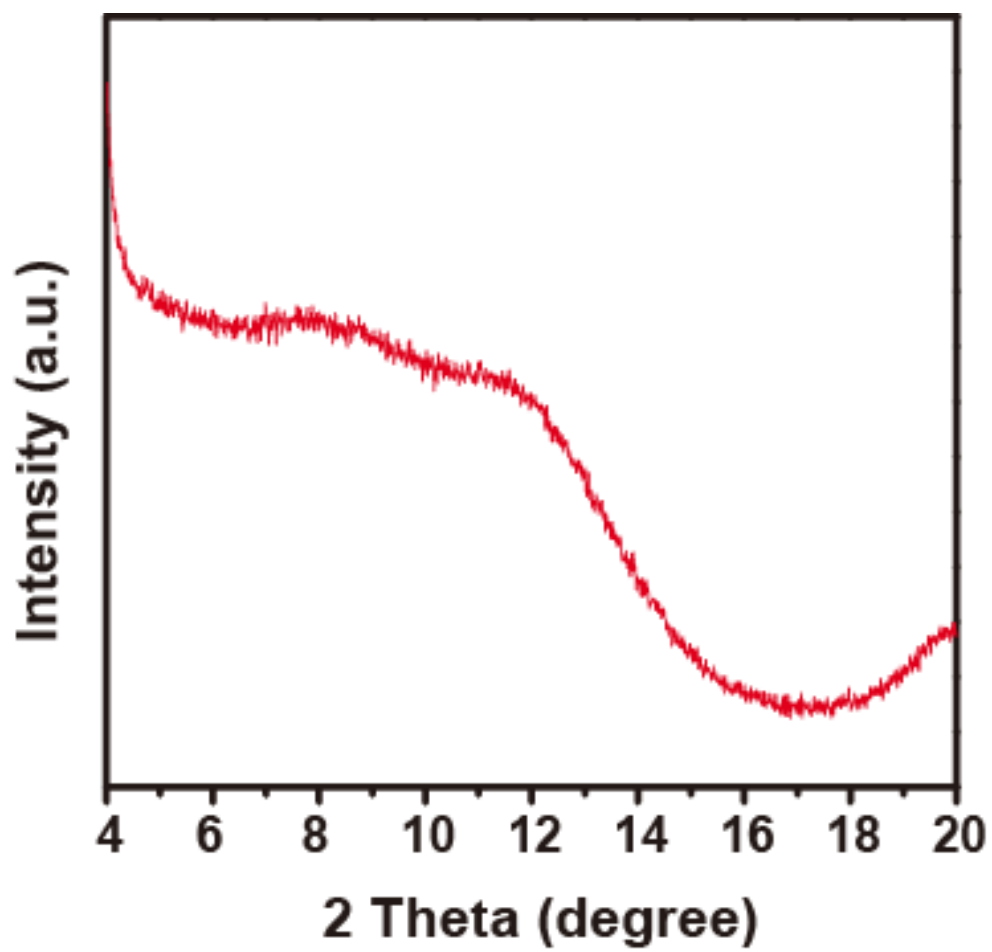

**Figure S3.** XRD pattern of NiSNT between 4°-20°.

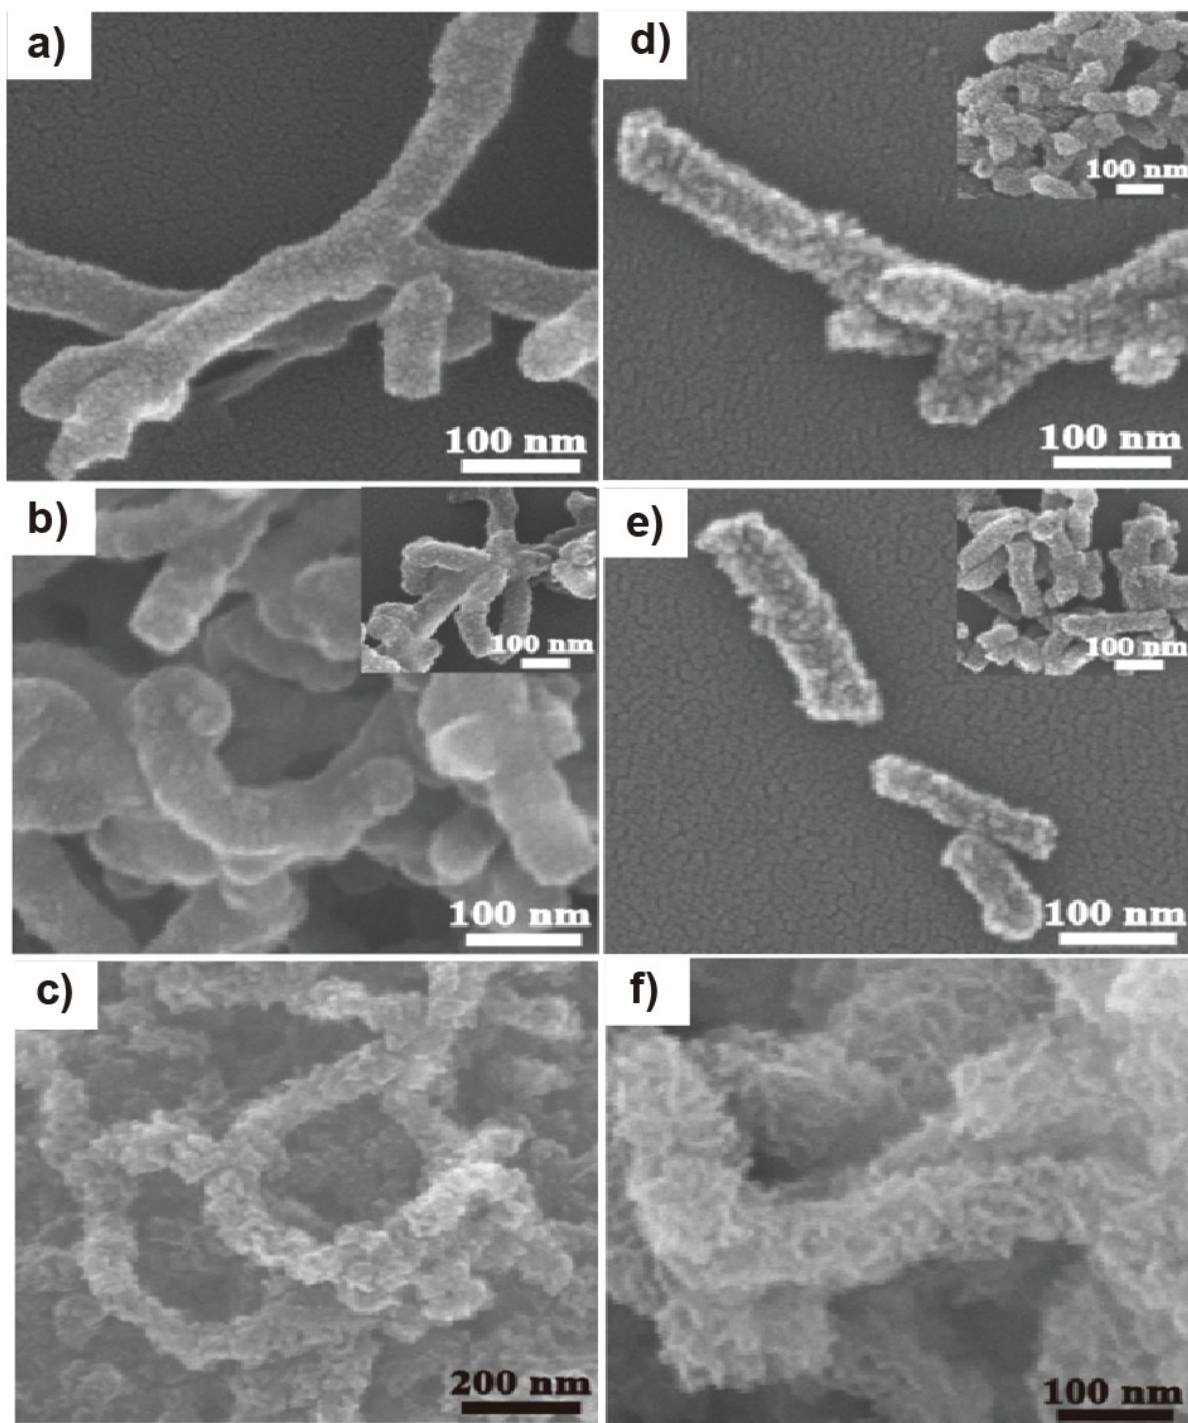

**Figure S4.** SEM images of CNT@NiSiOx synthesized for different times of a) 0.5, b) 1 and c) 3 h; and NiSNT synthesized for d) 0.5, e) 1 and f) 3h.

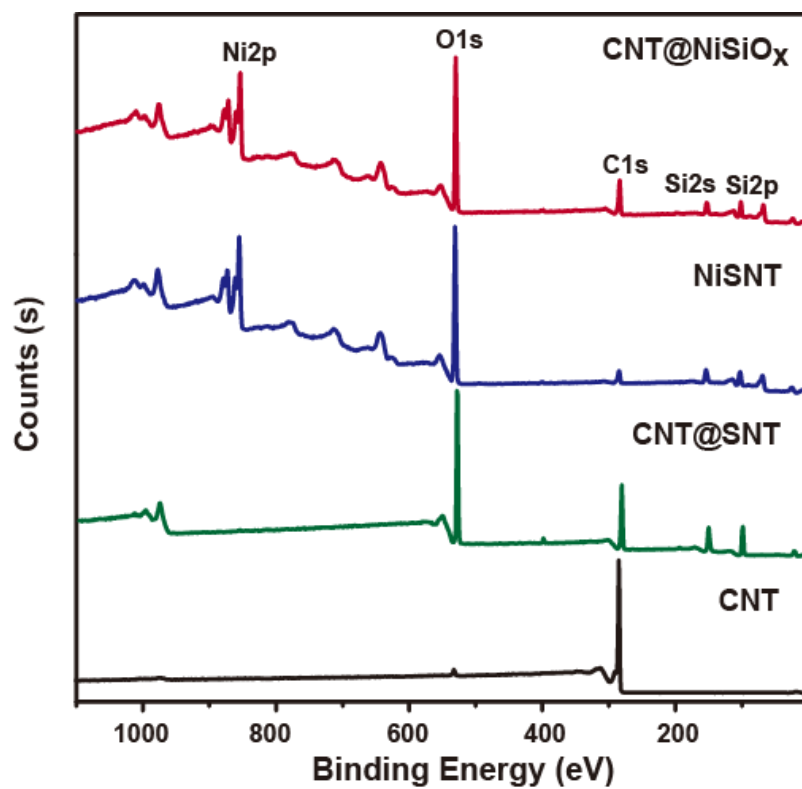

**Figure S5.** XPS surveys of CNT@NiSiO<sub>x</sub>, NiSNT, CNT@SNT and CNT.

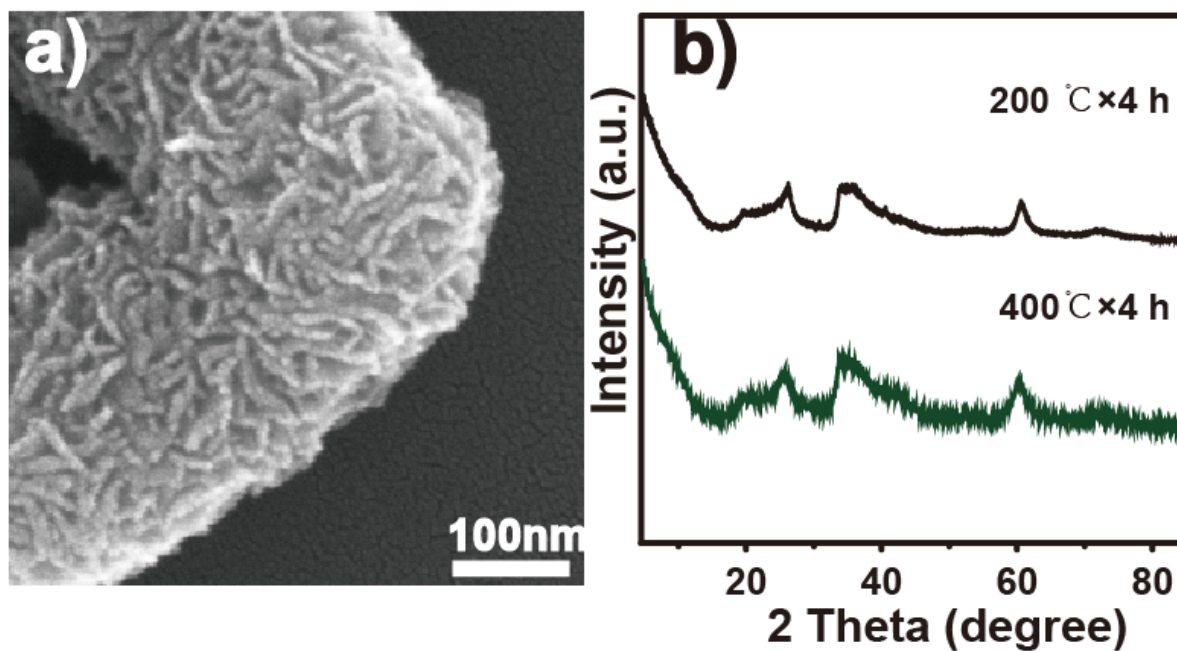

**Figure S6.** (a) SEM image and (b) XRD patterns of CNT@NiSiO<sub>x</sub> after calcinated at different temperatures.

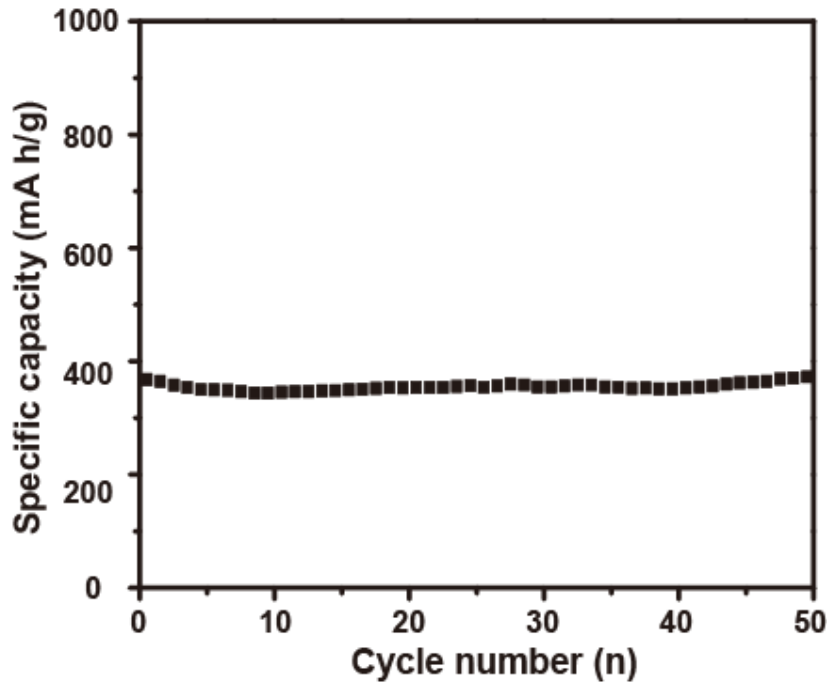

Figure S7. Cycling performance of CNTs.

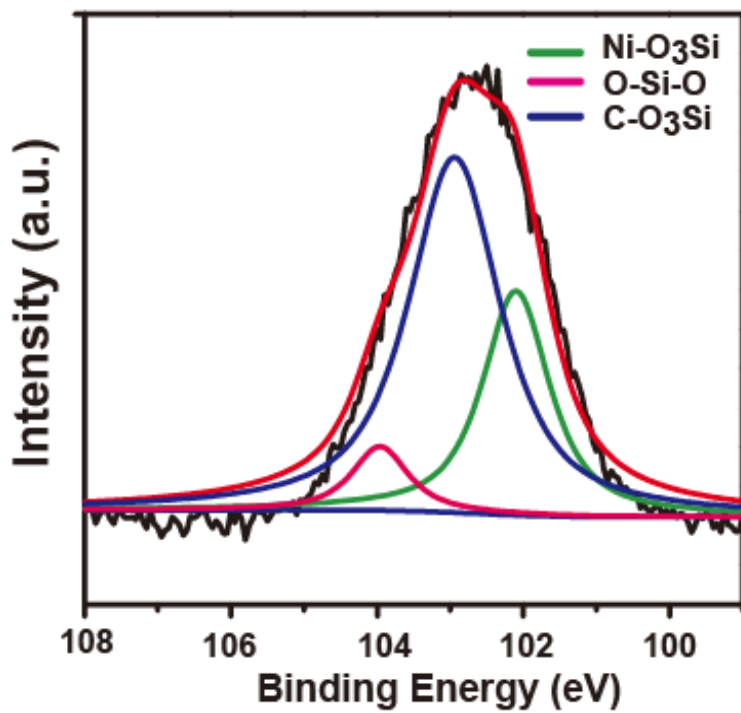

Figure S8. Si 2p XPS spectrum of CNT@NiSiO<sub>x</sub> after 50 discharge/charge cycles.
